# Supplementary material for: Lipidomic Analysis of Liver and Adipose Tissue in a High-Fat Diet-Induced Non-Alcoholic Fatty Liver Disease Mice Model Reveals Alterations in Lipid Metabolism by Weight Loss and Aerobic Exercise
Source: MDPI journal article supplement (doi:10.3390/molecules29071494), 2024-03-27
Supplement: s1 [file s1]

**Supplementary table S1.** Comparisons of the mice body weights among the groups HFD-HFDex, HFD-WL, HFD-WLex, ND-WL, ND-WLex during diet and exercise innervations. P values<0.05 were indicated as significant and highlighted.

| Week of intervention   | week 0   | week 1   | week 2   | week 3   | week 4   | week 5   | week 6   | week 7   | week 8   |
|------------------------|----------|----------|----------|----------|----------|----------|----------|----------|----------|
| Week of the experiment | week 12  | week 13  | week 14  | week 15  | week 16  | week 17  | week 18  | week 19  | week 20  |
| HFD-HFDex              | 8.14E-01 | 6.76E-01 | 4.19E-01 | 2.30E-01 | 1.37E-01 | 1.51E-01 | 1.37E-01 | 1.67E-01 | 2.01E-01 |
| HFD-WL                 | 7.35E-01 | 6.11E-01 | 2.33E-02 | 4.46E-02 | 7.20E-03 | 2.10E-03 | 3.50E-03 | 3.00E-04 | 3.00E-04 |
| HFD-WLex               | 6.58E-01 | 6.50E-02 | 1.70E-03 | 1.10E-02 | 6.00E-04 | 7.00E-04 | 1.00E-04 | 5.00E-04 | 4.00E-04 |
| ND-WL                  | 8.00E-04 | 1.50E-03 | 1.32E-02 | 1.32E-02 | 8.52E-02 | 3.75E-01 | 3.89E-01 | 8.14E-01 | 5.49E-01 |
| ND-WLex                | 1.06E-02 | 6.40E-02 | 1.06E-01 | 2.20E-01 | 3.22E-01 | 5.66E-01 | 9.79E-01 | 9.38E-01 | 6.29E-01 |

**Supplementary table S2.** Characteristics of the constructed unsupervised and supervised models, log transformation and pareto (PAR) scale were used in all models in Liver -ESI and adipose tissue +ESI, while only pareto (PAR) scale was used in Liver +ESI models.

| Model                   | Type    | N  | R2X(cum) | R2Y(cum) | Q2(cum) | CV ANOVA  |
|-------------------------|---------|----|----------|----------|---------|-----------|
| Liver +ESI              |         |    |          |          |         |           |
| ND-HFD-HFDex-WL-WLex_QC | PCA-X   | 42 | 0.552    |          | 0.348   |           |
| ND-HFD-HFDex-WL-WLex    | PCA-X   | 35 | 0.519    |          | 0.349   |           |
| HFD-ND                  | OPLS-DA | 14 | 0.507    | 0.996    | 0.946   | 1.04e-005 |
| HFD-WL                  | OPLS-DA | 14 | 0.404    | 0.991    | 0.912   | 8.92e-005 |
| HFD-WLex                | OPLS-DA | 14 | 0.441    | 0.989    | 0.914   | 8.04e-005 |
| Liver -ESI              |         |    |          |          |         |           |
| ND-HFD-HFDex-WL-WLex_QC | PCA-X   | 43 | 0.674    |          | 0.539   |           |
| ND-HFD-HFDex-WL-WLex    | PCA-X   | 35 | 0.617    |          | 0.467   |           |
| HFD-ND                  | OPLS-DA | 14 | 0.608    | 0.991    | 0.955   | 4.61e-006 |
| HFD-WL                  | OPLS-DA | 14 | 0.533    | 0.973    | 0.915   | 7.81e-005 |
| HFD-WLex                | OPLS-DA | 14 | 0.569    | 0.985    | 0.936   | 2.14e-005 |
| Adipose tissue +ESI     |         |    |          |          |         |           |
| ND-HFD-HFDex-WL-WLex_QC | PCA-X   | 42 | 0.714    |          | 0.517   |           |
| ND-HFD-HFDex-WL-WLex    | PCA-X   | 34 | 0.742    |          | 0.522   |           |
| ND-HFD-HFDex-WL-WLex    | PLS     | 34 | 0.51     | 0.312    | 0.152   | 6.58e-006 |
| HFD-ND                  | OPLS-DA | 14 | 0.696    | 0.983    | 0.952   | 6.90e-006 |
| HFD-WL                  | OPLS-DA | 13 | 0.407    | 0.928    | 0.712   | 3.10e-02  |
| HFD-WLex                | OPLS-DA | 14 | 0.555    | 0.937    | 0.776   | 5.00E-03  |

**Supplementary Table S3.** Summary of all statistically identified lipids in the liver of mice for the three binary comparisons, HFD\_ND, HFD\_WL, HFD\_WLex. Information is provided regarding the structural formula and fatty acid chains of the lipids, molecular structure, monoisotopic mass, detected derivatives, retention time, and mass accuracy.

| HFD-ND |             |              |                 |                   |                   |                          |        |           |                                   |
|--------|-------------|--------------|-----------------|-------------------|-------------------|--------------------------|--------|-----------|-----------------------------------|
| a/a    | Bulk number | Annotations  | Neutral Formula | Exact mass<br>m/z | Monoisotopic mass | Monoisotopic mass adduct | D(ppm) | Rt<br>min | Adduct                            |
| 1      | DG 36:2     | DG 18:1_18:1 | C39H72O5        | 638.5662          | 620.5380          | 638.5718                 | -8.72  | 13.6      | [M+NH <sub>4</sub> ] <sup>+</sup> |
| 2      | DG 36:3     | DG 18:1_18:2 | C39H70O5        | 636.5591          | 618.5223          | 636.5561                 | 4.71   | 11.8      | [M+NH <sub>4</sub> ] <sup>+</sup> |
| 3      | DG 36:4     | DG 18:2_18:2 | C39H68O5        | 634.5395          | 616.5067          | 634.5405                 | -1.58  | 9.4       | [M+NH <sub>4</sub> ] <sup>+</sup> |
| 4      | DG 38:2     | DG 18:1_20:1 | C41H76O5        | 666.5978          | 648.5692          | 666.6031                 | -7.94  | 13.8      | [M+NH <sub>4</sub> ] <sup>+</sup> |
| 5      | DG 38:3     | DG 18:2_20:1 | C41H74O5        | 664.5830          | 646.5536          | 664.5874                 | -6.55  | 13.3      | [M+NH <sub>4</sub> ] <sup>+</sup> |
| 6      | DG 38:4     | DG 18:1_20:3 | C41H72O5        | 662.5709          | 644.5379          | 662.5718                 | -1.31  | 12.6      | [M+NH <sub>4</sub> ] <sup>+</sup> |
| 7      | DG 40:7     | DG 18:1_22:6 | C43H70O5        | 684.5607          | 666.5223          | 684.5561                 | 6.68   | 10.2      | [M+NH <sub>4</sub> ] <sup>+</sup> |
| 8      | DG 40:8     | DG 18:2_22:6 | C43H68O5        | 682.5357          | 664.5066          | 682.5405                 | -6.97  | 8.1       | [M+NH <sub>4</sub> ] <sup>+</sup> |
| 9      | FA 16:0     | FA 16:0      | C16H32O2        | 255.2354          | 256.2402          | 255.2330                 | 9.55   | 2.7       | [M-H] <sup>-</sup>                |
| 10     | FA 16:1     | FA 16:1      | C16H30O2        | 253.2178          | 254.2246          | 253.2173                 | 2.05   | 2.0       | [M-H] <sup>-</sup>                |
| 11     | FA 18:1     | FA 18:1      | C18H34O2        | 281.2483          | 282.2559          | 281.2486                 | -1.07  | 2.8       | [M-H] <sup>-</sup>                |
| 12     | FA 18:2     | FA 18:2      | C18H32O2        | 279.2335          | 280.2402          | 279.2330                 | 1.79   | 2.2       | [M-H] <sup>-</sup>                |
| 13     | FA 18:3     | FA 18:3      | C18H30O2        | 277.2171          | 278.2246          | 277.2173                 | -0.74  | 1.7       | [M-H] <sup>-</sup>                |
| 14     | FA 18:4     | FA 18:4      | C18H28O2        | 275.2012          | 276.2089          | 275.2017                 | -1.75  | 1.4       | [M-H] <sup>-</sup>                |
| 15     | FA 20:1     | FA 20:1      | C20H38O2        | 309.2801          | 310.2872          | 309.2799                 | 0.80   | 3.7       | [M-H] <sup>-</sup>                |
| 16     | FA 20:2     | FA 20:2      | C20H36O2        | 307.2638          | 308.2715          | 307.2643                 | -1.65  | 3.0       | [M-H] <sup>-</sup>                |
| 17     | FA 20:3     | FA 20:3      | C20H34O2        | 305.2482          | 306.2559          | 305.2486                 | -1.24  | 2.6       | [M-H] <sup>-</sup>                |
| 18     | FA 20:5     | FA 20:5      | C20H30O2        | 301.2164          | 302.2246          | 301.2173                 | -3.09  | 1.6       | [M-H] <sup>-</sup>                |
| 19     | FA 22:3     | FA 22:3      | C22H38O2        | 333.2800          | 334.2872          | 333.2799                 | 0.39   | 3.3       | [M-H] <sup>-</sup>                |
| 20     | FA 22:4     | FA 22:4      | C22H36O2        | 331.2642          | 332.2715          | 331.2643                 | -0.43  | 2.7       | [M-H] <sup>-</sup>                |
| 21     | FA 22:5     | FA 22:5      | C22H34O2        | 329.2486          | 330.2559          | 329.2486                 | 0.14   | 2.1       | [M-H] <sup>-</sup>                |
| 22     | FA 22:6     | FA 22:6      | C22H32O2        | 327.2317          | 328.2402          | 327.2330                 | -4.10  | 1.9       | [M-H] <sup>-</sup>                |
| 23     | LPC 18:2    | LPC 18:2     | C26H50NO7P      | 564.3304          | 519.3325          | 564.3307                 | -0.57  | 1.0       | [M+HCOO] <sup>-</sup>             |
| 24     | LPC 20:4    | LPC 20:4     | C28H50NO7P      | 588.3303          | 543.3325          | 588.3307                 | -0.73  | 1.0       | [M+HCOO] <sup>-</sup>             |
| 25     | LPE 18:2    | LPE 18:2     | C23H44NO7P      | 476.2781          | 477.2855          | 476.2783                 | -0.34  | 1.1       | [M-H] <sup>-</sup>                |

|    |            |                                            |             |          |          |          |       |      |                       |
|----|------------|--------------------------------------------|-------------|----------|----------|----------|-------|------|-----------------------|
| 26 | PC 32:0    | PC 16:0_16:0                               | C40H80NO8P  | 734.5721 | 733.5622 | 734.5694 | 3.68  | 8.0  | [M+H]+                |
| 27 | PC 32:1    | PC 16:0_16:1                               | C40H78NO8P  | 732.5473 | 731.5465 | 732.5538 | -8.85 | 6.3  | [M+H]+                |
| 28 | PC 34:1    | PC 16:0_18:1                               | C42H82NO8P  | 804.5732 | 759.5778 | 804.5760 | -3.50 | 8.3  | [M+HCOO]-             |
| 29 | PC 34:2    | PC 16:0_18:2                               | C42H80NO8P  | 802.5575 | 757.5622 | 802.5604 | -3.61 | 6.7  | [M+HCOO]-             |
| 30 | PC 34:3    | PC 16:1_18:2                               | C42H78NO8P  | 800.5412 | 755.5465 | 800.5447 | -4.36 | 5.3  | [M+HCOO]-             |
| 31 | PC 36:2    | PC 18:0_18:2                               | C44H84NO8P  | 830.5889 | 785.5935 | 830.5917 | -3.43 | 8.8  | [M+HCOO]-             |
| 32 | PC 36:3    | PC 18:1_18:2                               | C44H82NO8P  | 828.5724 | 783.5778 | 828.5760 | -4.34 | 6.8  | [M+HCOO]-             |
| 33 | PC 36:4    | PC 18:2_18:2                               | C44H80NO8P  | 826.5625 | 781.5622 | 826.5604 | 2.52  | 5.6  | [M+HCOO]-             |
| 34 | PC 36:5    | PC 18:2_18:3                               | C44H78NO8P  | 824.5419 | 779.5465 | 824.5447 | -3.34 | 4.6  | [M+HCOO]-             |
| 35 | PC 36:5    | PC 16:0_20:5                               | C44H78NO8P  | 780.5514 | 779.5465 | 780.5538 | -3.09 | 5.4  | [M+H]+                |
| 36 | PC 38:3    | PC 18:0_20:3                               | C46H86NO8P  | 812.6161 | 811.6091 | 812.6164 | -0.37 | 9.5  | [M+H]+                |
| 37 | PC 38:5    | PC 18:1_20:4                               | C46H82NO8P  | 808.5868 | 807.5778 | 808.5851 | 2.10  | 6.6  | [M+H]+                |
| 38 | PC 40:5    | PC 18:0_22:5                               | C48H86NO8P  | 836.6210 | 835.6091 | 836.6164 | 5.47  | 8.6  | [M+H]+                |
| 39 | PC 40:8    | PC 18:2_22:6                               | C48H80NO8P  | 830.5625 | 829.5621 | 830.5694 | -8.30 | 5.0  | [M+H]+                |
| 40 | PE 34:2    | PE 16:0_18:2                               | C39H74NO8P  | 714.5114 | 715.5152 | 714.5079 | 4.86  | 7.2  | [M-H]-                |
| 41 | PE 36:2    | PE 18:0_18:2                               | C41H78NO8P  | 742.5405 | 743.5465 | 742.5392 | 1.82  | 9.6  | [M-H]-                |
| 42 | PE 36:3    | PE 18:1_18:2                               | C41H76NO8P  | 740.5297 | 741.5309 | 740.5236 | 8.20  | 7.4  | [M-H]-                |
| 43 | PE 36:4    | PE 16:0_20:4                               | C41H74NO8P  | 740.5168 | 739.5152 | 740.5225 | -7.68 | 7.0  | [M+H]+                |
| 44 | PE 36:5    | PE 16:0_20:5                               | C41H72NO8P  | 736.4925 | 737.4996 | 736.4923 | 0.30  | 5.7  | [M-H]-                |
| 45 | PE 38:5    | PE 18:0_20:5                               | C43H76NO8P  | 766.5408 | 765.5309 | 766.5381 | 3.54  | 7.6  | [M+H]+                |
| 46 | PE 38:6    | PE 16:0_22:6                               | C43H74NO8P  | 762.5050 | 763.5152 | 762.5079 | -3.80 | 6.5  | [M-H]-                |
| 47 | PE 38:7    | PE 16:1_22:6                               | C43H72NO8P  | 760.4950 | 761.4996 | 760.4923 | 3.55  | 5.0  | [M-H]-                |
| 48 | PE 40:6    | PE 18:0_22:6                               | C45H78NO8P  | 790.5354 | 791.5465 | 790.5392 | -4.84 | 8.5  | [M-H]-                |
| 49 | PI 34:2    | PI 16:0_18:2                               | C43H79O13P  | 833.5206 | 834.5258 | 833.5186 | 2.43  | 4.8  | [M-H]-                |
| 50 | PI 38:5    | PI 18:0_20:5                               | C47H81O13P  | 883.5341 | 884.5415 | 883.5342 | -0.09 | 5.1  | [M-H]-                |
| 51 | PS 38:6    | PS 16:0_22:6                               | C44H74NO10P | 806.4998 | 807.5050 | 806.4978 | 2.47  | 4.6  | [M-H]-                |
| 52 | SM 40:1;O2 | SM 40:1;O2                                 | C45H91N2O6P | 831.6553 | 786.6615 | 831.6597 | -5.29 | 13.1 | [M+HCOO]-             |
| 53 | SM 41:1;O2 | SM 41:1;O2                                 | C46H93N2O6P | 801.6883 | 800.6771 | 801.6844 | 4.86  | 13.4 | [M+H]+                |
| 54 | SM 42:1;O2 | SM 42:1;O2                                 | C47H95N2O6P | 815.6974 | 814.6928 | 815.7000 | -3.25 | 13.7 | [M+H]+                |
| 55 | TG 52:2    | TG (16:0_18:0_18:2)<br>TG (16:1_18:0_18:1) | C55H102O6   | 876.8034 | 858.7676 | 876.8015 | 2.13  | 16.5 | [M+NH <sub>4</sub> ]+ |

| 56     | TG 52:4     | TG (16:0_18:1_18:3)<br>TG(16:0_16:1_20:3)<br>TG (14:0_18:1_20:3)<br>TG (16:0_18:2_18:2)<br>TG (16:1_16:1_20:2)                       | C55H98O6        | 872.7750          | 854.7363          | 872.7702                 | 5.50   | 15.5      | [M+NH <sub>4</sub> ] <sup>+</sup> |
|--------|-------------|--------------------------------------------------------------------------------------------------------------------------------------|-----------------|-------------------|-------------------|--------------------------|--------|-----------|-----------------------------------|
| 57     | TG 56:8     | TG (16:0_18:2_22:6)<br>TG (16:1_18:2_22:5)<br>TG (16:0_20:4_20:4)<br>TG(18:2_18:1_20:5)<br>TG(18:2_18:2_20:4)<br>TG (16:1_20:2_20:5) | C59H98O6        | 920.7700          | 902.7363          | 920.7702                 | -0.22  | 15.3      | [M+NH <sub>4</sub> ] <sup>+</sup> |
| 58     | TG 56:9     | TG (18:2_18:3_20:4)<br>TG (16:1_18:2_22:6)<br>TG (16:1_18:3_22:5)<br>TG (18:2_18:2_20:4)                                             | C59H96O6        | 918.7516          | 900.7207          | 918.7545                 | -3.20  | 15.0      | [M+NH <sub>4</sub> ] <sup>+</sup> |
| HDF_WL |             |                                                                                                                                      |                 |                   |                   |                          |        |           |                                   |
| a/a    | Bulk number | Annotations                                                                                                                          | Neutral Formula | Exact mass<br>m/z | Monoisotopic mass | Monoisotopic mass adduct | D(ppm) | Rt<br>min | Adduct                            |
| 1      | DG 36:2     | DG 18:1_18:1                                                                                                                         | C39H72O5        | 638.5662          | 620.5380          | 638.5718                 | -8.72  | 13.6      | [M+NH <sub>4</sub> ] <sup>+</sup> |
| 2      | DG 36:4     | DG 18:2_18:2                                                                                                                         | C39H68O5        | 634.5395          | 616.5067          | 634.5405                 | -1.58  | 9.4       | [M+NH <sub>4</sub> ] <sup>+</sup> |
| 3      | DG 38:2     | DG 18:1_20:1                                                                                                                         | C41H76O5        | 666.5978          | 648.5692          | 666.6031                 | -7.94  | 13.8      | [M+NH <sub>4</sub> ] <sup>+</sup> |
| 4      | DG 38:3     | DG 18:2_20:1                                                                                                                         | C41H74O5        | 664.5830          | 646.5536          | 664.5874                 | -6.55  | 13.3      | [M+NH <sub>4</sub> ] <sup>+</sup> |
| 5      | DG 38:4     | DG 18:1_20:3                                                                                                                         | C41H72O5        | 662.5709          | 644.5379          | 662.5718                 | -1.31  | 12.6      | [M+NH <sub>4</sub> ] <sup>+</sup> |
| 6      | DG 40:7     | DG 18:1_22:6                                                                                                                         | C43H70O5        | 684.5566          | 666.5223          | 684.5561                 | 0.73   | 10.2      | [M+NH <sub>4</sub> ] <sup>+</sup> |
| 7      | DG 40:8     | DG 18:2_22:6                                                                                                                         | C43H68O5        | 682.5357          | 664.5066          | 682.5405                 | -6.97  | 8.1       | [M+NH <sub>4</sub> ] <sup>+</sup> |
| 8      | FA 16:0     | FA 16:0                                                                                                                              | C16H32O2        | 255.2338          | 256.2402          | 255.2330                 | 3.13   | 2.7       | [M-H] <sup>-</sup>                |
| 9      | FA 16:1     | FA 16:1                                                                                                                              | C16H30O2        | 253.2178          | 254.2246          | 253.2173                 | 2.05   | 2.0       | [M-H] <sup>-</sup>                |
| 10     | FA 18:2     | FA 18:2                                                                                                                              | C18H32O2        | 279.2335          | 280.2402          | 279.2330                 | 1.79   | 2.2       | [M-H] <sup>-</sup>                |
| 11     | FA 18:3     | FA 18:3                                                                                                                              | C18H30O2        | 277.2171          | 278.2246          | 277.2173                 | -0.74  | 1.7       | [M-H] <sup>-</sup>                |
| 12     | FA 18:4     | FA 18:4                                                                                                                              | C18H28O2        | 275.2012          | 276.2089          | 275.2017                 | -1.75  | 1.4       | [M-H] <sup>-</sup>                |
| 13     | FA 20:1     | FA 20:1                                                                                                                              | C20H38O2        | 309.2801          | 310.2872          | 309.2799                 | 0.80   | 3.7       | [M-H] <sup>-</sup>                |

|    |          |                              |            |          |          |          |       |     |           |
|----|----------|------------------------------|------------|----------|----------|----------|-------|-----|-----------|
| 14 | FA 20:2  | FA 20:2                      | C20H36O2   | 307.2638 | 308.2715 | 307.2643 | -1.65 | 3.0 | [M-H]-    |
| 15 | FA 20:3  | FA 20:3                      | C20H34O2   | 305.2482 | 306.2559 | 305.2486 | -1.24 | 2.6 | [M-H]-    |
| 16 | FA 20:5  | FA 20:5                      | C20H30O2   | 301.2164 | 302.2246 | 301.2173 | -3.09 | 1.6 | [M-H]-    |
| 17 | FA 22:3  | FA 22:3                      | C22H38O2   | 333.2800 | 334.2872 | 333.2799 | 0.39  | 3.3 | [M-H]-    |
| 18 | FA 22:4  | FA 22:4                      | C22H36O2   | 331.2642 | 332.2715 | 331.2643 | -0.43 | 2.7 | [M-H]-    |
| 19 | FA 22:5  | FA 22:5                      | C22H34O2   | 329.2486 | 330.2559 | 329.2486 | 0.14  | 2.1 | [M-H]-    |
| 20 | FA 22:6  | FA 22:6                      | C22H32O2   | 327.2317 | 328.2402 | 327.2330 | -4.10 | 1.9 | [M-H]-    |
| 21 | LPC 18:0 | LPC 18:0                     | C26H54NO7P | 524.3718 | 523.3638 | 524.3711 | 1.33  | 1.8 | [M+H]+    |
| 22 | LPC 18:2 | LPC 18:2                     | C26H50NO7P | 564.3304 | 519.3325 | 564.3307 | -0.57 | 1.0 | [M+HCOO]- |
| 23 | LPC 20:4 | LPC 20:4                     | C28H50NO7P | 588.3303 | 543.3325 | 588.3307 | -0.73 | 1.0 | [M+HCOO]- |
| 24 | LPE 18:2 | LPE 18:2                     | C23H44NO7P | 476.2781 | 477.2855 | 476.2783 | -0.34 | 1.1 | [M-H]-    |
| 25 | PC 32:0  | PC 16:0_16:0                 | C40H80NO8P | 734.5721 | 733.5622 | 734.5694 | 3.68  | 8.0 | [M+H]+    |
| 26 | PC 32:1  | PC 16:0_16:1                 | C40H78NO8P | 732.5473 | 731.5465 | 732.5538 | -8.85 | 6.3 | [M+H]+    |
| 27 | PC 34:2  | PC 16:0_18:2                 | C42H80NO8P | 802.5575 | 757.5622 | 802.5604 | -3.61 | 6.7 | [M+HCOO]- |
| 28 | PC 36:2  | PC 18:0_18:2                 | C44H84NO8P | 830.5889 | 785.5935 | 830.5917 | -3.43 | 8.8 | [M+HCOO]- |
| 29 | PC 36:4  | PC 18:2_18:2                 | C44H80NO8P | 826.5625 | 781.5622 | 826.5604 | 2.52  | 5.6 | [M+HCOO]- |
| 30 | PC 36:5  | PC 18:2_18:3                 | C44H78NO8P | 824.5503 | 779.5465 | 824.5447 | 6.83  | 5.3 | [M+HCOO]- |
| 31 | PC 38:5  | PC 18:0_20:5<br>PC 16:0_22:5 | C46H82NO8P | 808.5861 | 807.5778 | 808.5851 | 1.29  | 7.1 | [M+H]+    |
| 32 | PC 40:5  | PC 18:0_22:5                 | C48H86NO8P | 836.6210 | 835.6091 | 836.6164 | 5.47  | 8.6 | [M+H]+    |
| 33 | PC 40:6  | PC 18:0_22:6                 | C48H84NO8P | 834.5973 | 833.5935 | 834.6007 | -4.12 | 7.9 | [M+H]+    |
| 34 | PC 40:8  | PC 18:2_22:6                 | C48H80NO8P | 830.5625 | 829.5621 | 830.5694 | -8.30 | 5.0 | [M+H]+    |
| 35 | PE 34:2  | PE 16:0_18:2                 | C39H74NO8P | 714.5114 | 715.5152 | 714.5079 | 4.86  | 7.2 | [M-H]-    |
| 36 | PE 36:2  | PE 18:0_18:2                 | C41H78NO8P | 742.5405 | 743.5465 | 742.5392 | 1.82  | 9.6 | [M-H]-    |
| 37 | PE 36:3  | PE 18:1_18:2                 | C41H76NO8P | 740.5297 | 741.5309 | 740.5236 | 8.20  | 7.4 | [M-H]-    |
| 38 | PE 36:4  | PE 16:0_20:4                 | C41H74NO8P | 740.5168 | 739.5152 | 740.5225 | -7.68 | 7.0 | [M+H]+    |
| 39 | PE 36:5  | PE 16:0_20:5                 | C41H72NO8P | 736.4925 | 737.4996 | 736.4923 | 0.30  | 5.7 | [M-H]-    |
| 40 | PE 38:5  | PE 18:0_20:5                 | C43H76NO8P | 766.5408 | 765.5309 | 766.5381 | 3.54  | 7.6 | [M+H]+    |
| 41 | PE 38:6  | PE 16:0_22:6                 | C43H74NO8P | 762.5050 | 763.5152 | 762.5079 | -3.80 | 6.5 | [M-H]-    |
| 42 | PE 38:7  | PE 16:1_22:6                 | C43H72NO8P | 760.4950 | 761.4996 | 760.4923 | 3.55  | 5.0 | [M-H]-    |
| 43 | PE 40:6  | PE 18:0_22:6                 | C45H78NO8P | 790.5354 | 791.5465 | 790.5392 | -4.84 | 8.5 | [M-H]-    |

| 44       | PE O-38:5   | PE O-18:1_20:4                                                                                                                       | C43H78NO7P      | 750.5432          | 751.5516          | 750.5443                 | -1.53  | 10.4      | [M-H]-                |
|----------|-------------|--------------------------------------------------------------------------------------------------------------------------------------|-----------------|-------------------|-------------------|--------------------------|--------|-----------|-----------------------|
| 45       | PI 34:2     | PI 16:0_18:2                                                                                                                         | C43H79O13P      | 833.5206          | 834.5258          | 833.5186                 | 2.43   | 4.8       | [M-H]-                |
| 46       | PI 38:5     | PI 18:0_20:5                                                                                                                         | C47H81O13P      | 883.5341          | 884.5415          | 883.5342                 | -0.09  | 5.1       | [M-H]-                |
| 47       | PS 38:6     | PS 16:0_22:6                                                                                                                         | C44H74NO10P     | 806.4998          | 807.5050          | 806.4978                 | 2.47   | 4.6       | [M-H]-                |
| 48       | SM 40:1;O2  | SM 40:1;O2                                                                                                                           | C45H91N2O6P     | 831.6553          | 786.6615          | 831.6597                 | -5.29  | 13.1      | [M+HCOO]-             |
| 49       | SM 41:1;O2  | SM 41:1;O2                                                                                                                           | C46H93N2O6P     | 801.6883          | 800.6771          | 801.6844                 | 4.86   | 13.4      | [M+H]+                |
| 50       | SM 42:1;O2  | SM 42:1;O2                                                                                                                           | C47H95N2O6P     | 815.6974          | 814.6928          | 815.7000                 | -3.25  | 13.7      | [M+H]+                |
| 51       | TG 52:2     | TG (16:0_18:0_18:2)<br>TG (16:1_18:0_18:1)                                                                                           | C55H102O6       | 876.8034          | 858.7676          | 876.8015                 | 2.13   | 16.5      | [M+NH <sub>4</sub> ]+ |
| 52       | TG 56:8     | TG (16:0_18:2_22:6)<br>TG (16:1_18:2_22:5)<br>TG (16:0_20:4_20:4)<br>TG(18:2_18:1_20:5)<br>TG(18:2_18:2_20:4)<br>TG (16:1_20:2_20:5) | C59H98O6        | 920.7700          | 902.7363          | 920.7702                 | -0.22  | 15.3      | [M+NH <sub>4</sub> ]+ |
| 53       | TG 56:9     | TG (18:2_18:3_20:4)<br>TG (16:1_18:2_22:6)<br>TG (16:1_18:3_22:5)<br>TG (18:2_18:2_20:4)                                             | C59H96O6        | 918.7516          | 900.7207          | 918.7545                 | -3.20  | 15.0      | [M+NH <sub>4</sub> ]+ |
| HFD_WLEX |             |                                                                                                                                      |                 |                   |                   |                          |        |           |                       |
| a/a      | Bulk number | Annotations                                                                                                                          | Neutral Formula | Exact mass<br>m/z | Monoisotopic mass | Monoisotopic mass adduct | D(ppm) | Rt<br>min | Adduct                |
| 1        | DG 36:2     | DG 18:1_18:1                                                                                                                         | C39H72O5        | 638.5662          | 620.5380          | 638.5718                 | -8.72  | 13.6      | [M+NH <sub>4</sub> ]+ |
| 2        | DG 36:3     | DG 18:1_18:2                                                                                                                         | C39H70O5        | 636.5591          | 618.5223          | 636.5561                 | 4.71   | 11.8      | [M+NH <sub>4</sub> ]+ |
| 3        | DG 36:4     | DG 18:2_18:2                                                                                                                         | C39H68O5        | 634.5395          | 616.5067          | 634.5405                 | -1.58  | 9.4       | [M+NH <sub>4</sub> ]+ |
| 4        | DG 38:2     | DG 18:1_20:1                                                                                                                         | C41H76O5        | 666.5978          | 648.5692          | 666.6031                 | -7.94  | 13.8      | [M+NH <sub>4</sub> ]+ |
| 5        | DG 38:3     | DG 18:2_20:1                                                                                                                         | C41H74O5        | 664.5830          | 646.5536          | 664.5874                 | -6.55  | 13.3      | [M+NH <sub>4</sub> ]+ |
| 6        | DG 38:4     | DG 18:1_20:3                                                                                                                         | C41H72O5        | 662.5709          | 644.5379          | 662.5718                 | -1.31  | 12.6      | [M+NH <sub>4</sub> ]+ |
| 7        | DG 40:8     | DG 18:2_22:6                                                                                                                         | C43H68O5        | 682.5357          | 664.5066          | 682.5405                 | -6.97  | 8.1       | [M+NH <sub>4</sub> ]+ |
| 8        | FA 16:0     | FA 16:0                                                                                                                              | C16H32O2        | 255.2338          | 256.2402          | 255.2330                 | 3.13   | 2.7       | [M-H]-                |
| 9        | FA 18:2     | FA 18:2                                                                                                                              | C18H32O2        | 279.2335          | 280.2402          | 279.2330                 | 1.79   | 2.2       | [M-H]-                |

|    |          |              |            |          |          |          |       |      |           |
|----|----------|--------------|------------|----------|----------|----------|-------|------|-----------|
| 10 | FA 18:3  | FA 18:3      | C18H30O2   | 277.2171 | 278.2246 | 277.2173 | -0.74 | 1.7  | [M-H]-    |
| 11 | FA 18:4  | FA 18:4      | C18H28O2   | 275.2012 | 276.2089 | 275.2017 | -1.75 | 1.4  | [M-H]-    |
| 12 | FA 20:1  | FA 20:1      | C20H38O2   | 309.2801 | 310.2872 | 309.2799 | 0.80  | 3.7  | [M-H]-    |
| 13 | FA 20:2  | FA 20:2      | C20H36O2   | 307.2638 | 308.2715 | 307.2643 | -1.65 | 3.0  | [M-H]-    |
| 14 | FA 20:3  | FA 20:3      | C20H34O2   | 305.2482 | 306.2559 | 305.2486 | -1.24 | 2.6  | [M-H]-    |
| 15 | FA 20:5  | FA 20:5      | C20H30O2   | 301.2164 | 302.2246 | 301.2173 | -3.09 | 1.6  | [M-H]-    |
| 16 | FA 22:3  | FA 22:3      | C22H38O2   | 333.2800 | 334.2872 | 333.2799 | 0.39  | 3.3  | [M-H]-    |
| 17 | FA 22:4  | FA 22:4      | C22H36O2   | 331.2642 | 332.2715 | 331.2643 | -0.43 | 2.7  | [M-H]-    |
| 18 | FA 22:5  | FA 22:5      | C22H34O2   | 329.2486 | 330.2559 | 329.2486 | 0.14  | 2.1  | [M-H]-    |
| 19 | FA 22:6  | FA 22:6      | C22H32O2   | 327.2317 | 328.2402 | 327.2330 | -4.10 | 1.9  | [M-H]-    |
| 20 | LPC 18:2 | LPC 18:2     | C26H50NO7P | 564.3304 | 519.3325 | 564.3307 | -0.57 | 1.0  | [M+HCOO]- |
| 21 | LPE 18:2 | LPE 18:2     | C23H44NO7P | 476.2781 | 477.2855 | 476.2783 | -0.34 | 1.1  | [M-H]-    |
| 22 | PC 34:2  | PC 16:0_18:2 | C42H80NO8P | 802.5575 | 757.5622 | 802.5604 | -3.61 | 6.7  | [M+HCOO]- |
| 23 | PC 36:2  | PC 18:0_18:2 | C44H84NO8P | 830.5889 | 785.5935 | 830.5917 | -3.43 | 8.8  | [M+HCOO]- |
| 24 | PC 36:3  | PC 18:1_18:2 | C44H82NO8P | 828.5724 | 783.5778 | 828.5760 | -4.34 | 6.8  | [M+HCOO]- |
| 25 | PC 36:3  | PC 18:0_18:3 | C44H82NO8P | 784.5861 | 783.5778 | 784.5851 | 1.26  | 7.7  | [M+H]+    |
|    |          | PC 18:2_18:2 |            |          |          |          |       | 5.5- |           |
| 26 | PC 36:4  | PC 16:0_20:4 | C44H80NO8P | 826.5625 | 781.5622 | 826.5604 | 2.52  | 6.4  | [M+HCOO]- |
| 27 | PC 36:5  | PC 18:2_18:3 | C44H78NO8P | 824.5503 | 779.5465 | 824.5447 | 6.83  | 5.3  | [M+HCOO]- |
| 28 | PC 36:5  | PC 16:0_20:5 | C44H78NO8P | 780.5514 | 779.5465 | 780.5538 | -3.09 | 5.4  | [M+H]+    |
| 29 | PC 38:3  | PC 18:0_20:3 | C46H86NO8P | 812.6186 | 811.6091 | 812.6164 | 2.71  | 9.5  | [M+H]+    |
| 30 | PC 38:5  | PC 18:1_20:4 | C43H76NO8P | 808.5868 | 807.5778 | 808.5851 | 2.10  | 6.6  | [M+H]+    |
| 31 | PC 40:5  | PC 18:0_22:5 | C48H86NO8P | 836.6210 | 835.6091 | 836.6164 | 5.47  | 8.6  | [M+H]+    |
| 32 | PC 40:8  | PC 18:2_22:6 | C48H80NO8P | 830.5625 | 829.5621 | 830.5694 | -8.30 | 5.0  | [M+H]+    |
| 33 | PE 34:2  | PE 16:0_18:2 | C39H74NO8P | 714.5114 | 715.5152 | 714.5079 | 4.86  | 7.2  | [M-H]-    |
| 34 | PE 36:2  | PE 18:0_18:2 | C41H78NO8P | 742.5405 | 743.5465 | 742.5392 | 1.82  | 9.6  | [M-H]-    |
| 35 | PE 36:3  | PE 18:1_18:2 | C41H76NO8P | 740.5297 | 741.5309 | 740.5236 | 8.20  | 7.4  | [M-H]-    |
| 36 | PE 36:4  | PE 16:0_20:4 | C41H74NO8P | 740.5168 | 739.5152 | 740.5225 | -7.68 | 7.0  | [M+H]+    |
| 37 | PE 36:5  | PE 16:0_20:5 | C41H72NO8P | 736.4925 | 737.4996 | 736.4923 | 0.30  | 5.7  | [M-H]-    |
| 38 | PE 38:5  | PE 18:0_20:5 | C43H76NO8P | 766.5408 | 765.5309 | 766.5381 | 3.54  | 7.6  | [M+H]+    |
| 39 | PE 38:6  | PE 16:0_22:6 | C43H74NO8P | 762.5050 | 763.5152 | 762.5079 | -3.80 | 6.5  | [M-H]-    |

|    |            |                     |             |          |          |          |       |      |                       |
|----|------------|---------------------|-------------|----------|----------|----------|-------|------|-----------------------|
| 40 | PE 38:7    | PE 16:1_22:6        | C43H72NO8P  | 760.4950 | 761.4996 | 760.4923 | 3.55  | 5.0  | [M-H]-                |
| 41 | PE 40:6    | PE 18:0_22:6        | C45H78NO8P  | 790.5351 | 791.5465 | 790.5392 | -5.19 | 8.5  | [M-H]-                |
| 42 | PE O-38:5  | PE O-18:1_20:4      | C43H78NO7P  | 750.5432 | 751.5516 | 750.5443 | -1.53 | 10.4 | [M-H]-                |
| 43 | PI 34:2    | PI 16:0_18:2        | C43H79O13P  | 833.5206 | 834.5258 | 833.5186 | 2.43  | 4.8  | [M-H]-                |
| 44 | PI 38:5    | PI 18:0_20:5        | C47H81O13P  | 883.5341 | 884.5415 | 883.5342 | -0.09 | 5.1  | [M-H]-                |
| 45 | SM 41:1;O2 | SM 41:1;O2          | C46H93N2O6P | 801.6883 | 800.6771 | 801.6844 | 4.86  | 13.4 | [M+H]+                |
| 46 | SM 42:1;O2 | SM 42:1;O2          | C47H95N2O6P | 815.6974 | 814.6928 | 815.7000 | -3.25 | 13.7 | [M+H]+                |
| 47 | TG 52:4    | TG (16:0_18:1_18:3) | C55H98O6    | 872.7750 | 854.7363 | 872.7702 | 5.50  | 15.5 | [M+NH <sub>4</sub> ]+ |
|    |            | TG (16:0_16:1_20:3) |             |          |          |          |       |      |                       |
|    |            | TG (14:0_18:1_20:3) |             |          |          |          |       |      |                       |
|    |            | TG (16:0_18:2_18:2) |             |          |          |          |       |      | [M+NH <sub>4</sub> ]+ |
|    |            | TG (16:1_16:1_20:2) |             |          |          |          |       |      |                       |
|    |            | TG (18:0_18:1_20:5) |             |          |          |          |       |      |                       |
|    |            | TG (18:0_18:3_20:3) |             |          |          |          |       |      |                       |
| 48 | TG 54:6    | TG (18:0_18:2_20:4) | C57H98O6    | 896.7690 | 878.7363 | 896.7702 | -1.37 | 15.4 | [M+NH <sub>4</sub> ]+ |
|    |            | TG (18:1_18:2_20:3) |             |          |          |          |       |      |                       |
|    |            | TG (18:2_18:2_20:2) |             |          |          |          |       |      |                       |
| 49 | TG 56:8    | TG (16:0_18:1_22:5) | C59H98O6    | 920.7700 | 902.7363 | 920.7702 | -0.22 | 15.3 | [M+NH <sub>4</sub> ]+ |
|    |            | TG (16:1_18:0_22:5) |             |          |          |          |       |      |                       |
|    |            | TG (16:0_18:2_22:6) |             |          |          |          |       |      |                       |
|    |            | TG (16:1_18:2_22:5) |             |          |          |          |       |      |                       |
|    |            | TG (16:0_20:4_20:4) |             |          |          |          |       |      |                       |
| 50 | TG 56:9    | TG(18:2_18:1_20:5)  | C59H96O6    | 918.7516 | 900.7207 | 918.7545 | -3.20 | 15.0 | [M+NH <sub>4</sub> ]+ |
|    |            | TG (16:1_20:2_20:5) |             |          |          |          |       |      |                       |
|    |            | TG (18:2_18:3_20:4) |             |          |          |          |       |      |                       |
|    |            | TG (16:1_18:2_22:6) |             |          |          |          |       |      |                       |
|    |            | TG (16:1_18:3_22:5) |             |          |          |          |       |      |                       |
|    |            | TG (18:2_18:2_20:4) |             |          |          |          |       |      |                       |



**Supplementary Table S4.** P values and Log2FC for all sums of fatty acids and indices studied in the comparisons HFD-ND, HFD-WL, HFD-WLEX.

| Fatty acids                     | HFD-ND          |        | HFD-WL          |        | HFD-WLEX        |        |
|---------------------------------|-----------------|--------|-----------------|--------|-----------------|--------|
| Ratio                           | P value         | log2FC | P value         | log2FC | P value         | log2FC |
| SFA                             | 2.26E-01        | 0.20   | 1.92E-01        | 0.19   | <b>1.64E-03</b> | 0.33   |
| MUFA                            | <b>1.35E-02</b> | -0.34  | 1.63E-01        | -0.28  | 1.00E+00        | -0.05  |
| PUFA                            | <b>1.12E-03</b> | 0.69   | 3.84E-01        | 0.42   | 4.63E-02        | 0.60   |
| D5-desaturase                   | <b>2.55E-04</b> | 1.04   | 8.89E-02        | 0.7    | <b>1.51E-02</b> | 0.88   |
| D6-desaturase                   | <b>1.25E-04</b> | -1.55  | 7.13E-01        | -0.68  | <b>3.05E-03</b> | -1.34  |
| D9-desaturase<br>(cC16:1/C16:0) | 8.89E-02        | -0.44  | <b>5.80E-04</b> | -0.81  | 5.85E-01        | -0.34  |
| D9-desaturase<br>(cC18:1/C18:0) | <b>3.12E-02</b> | -0.68  | <b>1.68E-02</b> | -0.43  | <b>2.55E-02</b> | -0.65  |
| DNL                             | <b>6.92E-05</b> | -0.65  | 2.85E-01        | -0.36  | <b>4.63E-02</b> | -0.48  |
| Elong                           | 1.00E+00        | 0.16   | 6.16E-02        | 0.26   | <b>1.68E-02</b> | 0.32   |
| N6/N3                           | <b>1.73E-05</b> | -1.18  | 1.77E-01        | -0.76  | <b>4.20E-02</b> | -0.86  |
| EFA                             | <b>3.86E-04</b> | 1.00   | 3.31E-01        | 0.61   | <b>4.37E-03</b> | 0.92   |
| NEFA                            | 2.26E-01        | -0.17  | 1.00E+00        | -0.12  | 1.00E+00        | 0.08   |

**Supplementary Table S5.** Summary of all statistically significant identified lipids in adipose tissue of mice for the three binary comparisons, HFD\_ND, HFD\_WL, HFD\_WLex. Information is provided regarding the structural formula and fatty acid chains of the lipids, molecular structure, monoisotopic mass, detected derivatives, retention time, and mass accuracy.

| HFD_ND |             |                                                                                                            |                 |                |                   |                          |          |        |                                   |
|--------|-------------|------------------------------------------------------------------------------------------------------------|-----------------|----------------|-------------------|--------------------------|----------|--------|-----------------------------------|
| a/a    | Bulk number | Annotations                                                                                                | Neutral Formula | Exact mass m/z | Monoisotopic mass | Monoisotopic mass adduct | D(ppm)   | Rt min | Adduct                            |
| 1      | TG 38:2     | TG(4:0_16:0_18:2) TG (4:0_16:1_18:1)                                                                       | C41H74O6        | 680.5824       | 662.54854         | 680.5829                 | -0.73466 | 9.3    | [M+NH <sub>4</sub> ] <sup>+</sup> |
| 2      | TG 40:3     | TG (4:0_18:1_18:2)                                                                                         | C43H76O6        | 706.5979       | 688.56419         | 706.5985                 | -0.84914 | 9.3    | [M+NH <sub>4</sub> ] <sup>+</sup> |
| 3      | TG 50:4     | TG(16:1_16:1_18:2)<br>TG(16:0_16:1_18:3)<br>TG(14:0_18:2_18:2)<br>TG(14:1_18:1_18:2)<br>TG(14:0_18:1_18:3) | C53H94O6        | 844.7343       | 826.7050          | 844.7389                 | -5.45    | 11.2   | [M+NH <sub>4</sub> ] <sup>+</sup> |
| 4      | TG 50:5     | TG(14:0/18:2/18:3)<br>TG(16:1/16:1/18:3)<br>TG(14:1/18:1/18:3)                                             | C53H92O6        | 842.7234       | 824.68939         | 842.7237                 | -0.35599 | 10.8   | [M+NH <sub>4</sub> ] <sup>+</sup> |
| 5      | TG 51:3     | TG(16:1_17:1_18:1)<br>TG(16:0_17:1_18:2)<br>TG(16:1_17:0_18:2)                                             | C54H98O6        | 860.7652       | 842.7363          | 860.7702                 | -5.81    | 12.0   | [M+NH <sub>4</sub> ] <sup>+</sup> |
| 6      | TG 52:1     | TG(16:0_18:0_18:1)                                                                                         | C55H104O6       | 878.8119       | 860.7833          | 878.8171                 | -5.92    | 13.2   | [M+NH <sub>4</sub> ] <sup>+</sup> |
| 7      | TG 52:2     | TG(16:0_18:1_18:1)<br>TG(16:1_18:0_18:1)<br>TG(16:0_18:0_18:2)                                             | C55H102O6       | 876.7972       | 858.7676          | 876.8015                 | -4.90    | 12.7   | [M+NH <sub>4</sub> ] <sup>+</sup> |
| 8      | TG 52:4     | TG(16:1_18:1_18:2)<br>TG(16:0_18:2_18:2)<br>TG(16:0_18:1_18:3)<br>TG(16:0_18:1_18:3)                       | C55H98O6        | 872.7659       | 854.7363          | 872.7702                 | -4.93    | 11.8   | [M+NH <sub>4</sub> ] <sup>+</sup> |

|    |         |                                                                                      |           |          |          |          |          |      |                                   |
|----|---------|--------------------------------------------------------------------------------------|-----------|----------|----------|----------|----------|------|-----------------------------------|
| 9  | TG 52:5 | TG(16:1_18:2_18:2)<br>TG(16:0_18:2_18:3)<br>TG(16:1_18:1_18:3)                       | C55H96O6  | 870.7499 | 852.7207 | 870.7545 | -5.28    | 11.3 | [M+NH <sub>4</sub> ] <sup>+</sup> |
| 10 | TG 52:6 | TG(16:1_18:2_18:3)<br>TG(16:0_18:3_18:3)                                             | C55H94O6  | 868.7356 | 850.7050 | 868.7389 | -3.80    | 10.9 | [M+NH <sub>4</sub> ] <sup>+</sup> |
| 11 | TG 53:4 | TG(17:1_18:1_18:2)<br>TG(17:0_18:2_18:2)                                             | C56H100O6 | 886.7804 | 868.7520 | 886.7858 | -6.09    | 12.0 | [M+NH <sub>4</sub> ] <sup>+</sup> |
| 12 | TG 54:2 | TG(16:0_18:0_18:1)<br>TG(16:0_18:0_18:1)                                             | C57H106O6 | 904.8284 | 886.7989 | 904.8328 | -4.86    | 13.2 | [M+NH <sub>4</sub> ] <sup>+</sup> |
| 13 | TG 54:3 | TG(18:1_18:1_18:1)<br>TG(16:1_18:1_20:1)<br>TG(16:0_18:2_20:1)                       | C57H104O6 | 902.8127 | 884.7833 | 902.8171 | -4.87    | 12.7 | [M+NH <sub>4</sub> ] <sup>+</sup> |
| 14 | TG 54:4 | TG(18:1_18:1_18:2)<br>TG(18:0_18:2_18:2)                                             | C57H102O6 | 900.7964 | 882.7676 | 900.8015 | -5.66162 | 12.3 | [M+NH <sub>4</sub> ] <sup>+</sup> |
| 15 | TG 54:5 | TG(18:1_18:2_18:2)<br>TG(18:1_18:1_18:3)<br>TG(18:1_18:1_18:3)                       | C57H100O6 | 898.7805 | 880.7520 | 898.7858 | -5.90    | 11.8 | [M+NH <sub>4</sub> ] <sup>+</sup> |
| 16 | TG 54:6 | TG(18:1_18:2_18:3)                                                                   | C57H98O6  | 896.7651 | 878.7363 | 896.7702 | -5.69    | 11.4 | [M+NH <sub>4</sub> ] <sup>+</sup> |
| 17 | TG 54:7 | TG(18:2_18:2_18:3)<br>TG(18:1_18:2_18:4)<br>TG(18:1_18:3_18:3)                       | C57H96O6  | 894.7499 | 876.7207 | 894.7545 | -5.14    | 11.0 | [M+NH <sub>4</sub> ] <sup>+</sup> |
| 18 | TG 56:2 | TG(18:0_18:1_20:1)<br>TG(18:1_18:1_20:0)                                             | C59H110O6 | 932.8570 | 914.8302 | 932.8641 | -7.61    | 13.7 | [M+NH <sub>4</sub> ] <sup>+</sup> |
| 19 | TG 56:3 | TG(18:0_18:1_20:2)<br>TG(18:0_18:2_20:1)<br>TG(18:1_18:2_20:0)<br>TG(18:1_18:1_20:1) | C59H108O6 | 930.8416 | 912.8146 | 930.8484 | -7.30516 | 13.2 | [M+NH <sub>4</sub> ] <sup>+</sup> |
| 20 | TG 56:4 | TG(18:1_18:2_20:1)<br>TG(18:1_18:1_20:2)<br>TG(18:0_18:2_20:2)<br>TG(18:2_18:2_20:0) | C59H106O6 | 928.8272 | 910.7989 | 928.8328 | -6.03    | 12.8 | [M+NH <sub>4</sub> ] <sup>+</sup> |

|            |                        |                                                                                                                                                                              |                            |                           |                              |                                     |               |               |                                   |
|------------|------------------------|------------------------------------------------------------------------------------------------------------------------------------------------------------------------------|----------------------------|---------------------------|------------------------------|-------------------------------------|---------------|---------------|-----------------------------------|
|            |                        | TG(18:1_18:2_20:2)<br>TG(18:1_18:1_20:3)<br>TG(18:0_18:2_20:3)<br>TG(16:0_18:1_22:4)<br>TG(16:0_20:2_20:3)<br>TG(18:2_18:2_20:1)<br>TG(16:0_18:0_22:5)<br>TG(16:0_18:2_22:3) | C59H104O6                  | 926.8113                  | 908.7833                     | 926.8171                            | -6.26         | 11.8-12.3     |                                   |
| 21         | TG 56:5                |                                                                                                                                                                              |                            |                           |                              |                                     |               |               | [M+NH <sub>4</sub> ] <sup>+</sup> |
|            |                        | TG(16:0_18:2_22:4) TG<br>(16:0_18:1_22:5) TG<br>(18:1_18:2_20:3) TG<br>(18:2_18:2_20:2)                                                                                      | C59H102O6                  | 924.7939                  | 906.7676                     | 924.8015                            | -8.22         | 11.4          |                                   |
| 22         | TG 56:6                |                                                                                                                                                                              |                            |                           |                              |                                     |               |               | [M+NH <sub>4</sub> ] <sup>+</sup> |
| HFD_WL     |                        |                                                                                                                                                                              |                            |                           |                              |                                     |               |               |                                   |
|            | <b>Bulk<br/>number</b> | <b>Annotations</b>                                                                                                                                                           | <b>Neutral<br/>Formula</b> | <b>Exact<br/>mass m/z</b> | <b>Monoisotopic<br/>mass</b> | <b>Monoisotopic<br/>mass adduct</b> | <b>D(ppm)</b> | <b>Rt min</b> | <b>Adduct</b>                     |
| 1          | TG 38:1                | TG(4:0_16:0_18:1)<br>TG(4:0_16:0_18:2) TG                                                                                                                                    | C41H76O6                   | 682.5977                  | 664.56419                    | 682.5985                            | -1.17199      | 9.7           | [M+NH <sub>4</sub> ] <sup>+</sup> |
| 2          | TG 38:2                | (4:0_16:1_18:1)                                                                                                                                                              | C41H74O6                   | 680.5824                  | 662.54854                    | 680.5829                            | -0.73466      | 9.3           | [M+NH <sub>4</sub> ] <sup>+</sup> |
| 3          | TG 40:1                |                                                                                                                                                                              | C43H80O6                   | 710.6294                  | 692.59549                    | 710.6298                            | -0.56288      | 9.7           | [M+NH <sub>4</sub> ] <sup>+</sup> |
| 4          | TG 40:3                | TG (4:0_18:1_18:2)                                                                                                                                                           | C43H76O6                   | 706.5979                  | 688.56419                    | 706.5985                            | -0.84914      | 9.3           | [M+NH <sub>4</sub> ] <sup>+</sup> |
| 5          | TG 42:2                |                                                                                                                                                                              | C45H82O6                   | 736.6445                  | 718.61114                    | 736.64551                           | -1.37108      | 9.7           | [M+NH <sub>4</sub> ] <sup>+</sup> |
| HFD_WLEX   |                        |                                                                                                                                                                              |                            |                           |                              |                                     |               |               |                                   |
| <b>a/a</b> | <b>Bulk<br/>number</b> | <b>Annotations</b>                                                                                                                                                           | <b>Neutral<br/>Formula</b> | <b>Exact<br/>mass m/z</b> | <b>Monoisotopic<br/>mass</b> | <b>Monoisotopic<br/>mass adduct</b> | <b>D(ppm)</b> | <b>Rt min</b> | <b>Adduct</b>                     |
| 4          | TG 40:3                | TG (4:0_18:1_18:2)                                                                                                                                                           | C43H76O6                   | 706.5979                  | 688.56419                    | 706.5985                            | -0.84914      | 9.3           | [M+NH <sub>4</sub> ] <sup>+</sup> |
| 5          | TG 42:2                |                                                                                                                                                                              | C45H82O6                   | 736.6445                  | 718.61114                    | 736.64551                           | -1.37108      | 9.7           | [M+NH <sub>4</sub> ] <sup>+</sup> |

**Supplementary table S6.** Description of the extractions performed on the mice liver and adipose tissue samples.

| Mice    | Liver    |                                    |       | Adipose tissue     |                                                 |                                 |                                |
|---------|----------|------------------------------------|-------|--------------------|-------------------------------------------------|---------------------------------|--------------------------------|
|         | mg Liver | $\mu\text{L}$ MTBE: MeOH (3:1 v/v) | mg AT | $\mu\text{L}$ MeOH | $\mu\text{L}$ CHCl <sub>3</sub> :MeOH (7:1 v/v) | $\mu\text{L}$ CHCl <sub>3</sub> | $\mu\text{L}$ H <sub>2</sub> O |
| HDF_1   | 29.9     | 454                                | 9.50  | 190                | 608                                             | 342                             | 171                            |
| HDF_2   | 45.9     | 699                                | 12.1  | 242                | 774                                             | 436                             | 218                            |
| HDF_3   | 29.7     | 452                                | 11.0  | 220                | 704                                             | 396                             | 198                            |
| HDF_4   | 20.8     | 316                                | 10.2  | 204                | 653                                             | 367                             | 184                            |
| HDF_5   | 48.8     | 743                                | 9.6   | 192                | 614                                             | 346                             | 173                            |
| HDF_6   | 50.3     | 765                                | 10.4  | 208                | 666                                             | 374                             | 187                            |
| HDF_7   | 29.2     | 445                                | 14.2  | 284                | 909                                             | 511                             | 256                            |
| HFDEX_1 | 19.6     | 299                                | 7.00  | 140                | 448                                             | 252                             | 126                            |
| HFDEX_2 | 37.0     | 563                                | 4.00  | 80                 | 256                                             | 144                             | 72                             |
| HFDEX_3 | 36.4     | 554                                | 4.30  | 86                 | 275                                             | 155                             | 77                             |
| HFDEX_4 | 49.1     | 748                                | 4.70  | 94                 | 301                                             | 169                             | 85                             |
| HFDEX_5 | 78.8     | 1200                               | 3.90  | 78                 | 250                                             | 140                             | 70                             |
| HFDEX_6 | 36.5     | 555                                | 12.7  | 254                | 813                                             | 457                             | 229                            |
| HFDEX_7 | 52.5     | 799                                | 9.70  | 194                | 621                                             | 349                             | 175                            |
| ND_1    | 26.2     | 399                                | 4.80  | 96                 | 307                                             | 173                             | 86                             |
| ND_2    | 27.4     | 417                                | 6.30  | 126                | 403                                             | 227                             | 113                            |
| ND_3    | 26.7     | 407                                | 6.80  | 136                | 435                                             | 245                             | 122                            |
| ND_4    | 22.5     | 342                                | 12.5  | 250                | 800                                             | 450                             | 225                            |
| ND_5    | 35.0     | 533                                | 9.70  | 194                | 621                                             | 349                             | 175                            |
| ND_6    | 24.0     | 365                                | 6.30  | 126                | 403                                             | 227                             | 113                            |
| ND_7    | 22.4     | 340                                | 11.9  | 238                | 762                                             | 428                             | 214                            |
| WL_1    | 41.1     | 625                                | 2.50  | 50                 | 160                                             | 90                              | 45                             |
| WL_2    | 26.7     | 406                                | 7.50  | 150                | 480                                             | 270                             | 135                            |
| WL_3    | 40.6     | 618                                | 5.60  | 112                | 358                                             | 202                             | 101                            |
| WL_4    | 28.7     | 437                                | 10.3  | 206                | 659                                             | 371                             | 185                            |
| WL_5    | 27.1     | 413                                |       |                    |                                                 |                                 |                                |
| WL_6    | 15.1     | 230                                | 8.00  | 160                | 512                                             | 288                             | 144                            |
| WL_7    | 24.1     | 367                                | 10.1  | 202                | 646                                             | 364                             | 182                            |
| WLEX_1  | 28.3     | 430                                | 12.5  | 250                | 800                                             | 450                             | 225                            |
| WLEX_2  | 32.5     | 495                                | 10.1  | 202                | 646                                             | 364                             | 182                            |
| WLEX_3  | 18.3     | 278                                | 10.4  | 208                | 666                                             | 374                             | 187                            |
| WLEX_4  | 17.2     | 261                                | 10.4  | 208                | 666                                             | 374                             | 187                            |
| WLEX_5  | 16.6     | 253                                | 8.60  | 172                | 550                                             | 310                             | 155                            |
| WLEX_6  | 29.4     | 448                                | 10.7  | 214                | 685                                             | 385                             | 193                            |
| WLEX_7  | 34.0     | 518                                | 8.90  | 178                | 570                                             | 320                             | 160                            |
